# Supplementary material for: The promotional effect of multiple active sites on Fe-based oxygen reduction electrocatalysts for a zinc–air battery
Source: Royal Society of Chemistry journal article supplement (doi:10.1039/d3ta03926a), 2023-01-01
Supplement: d3ta03926a1.pdf [file d3ta03926a1.pdf]

# Supporting Information

## Promotional effect on multiple active sites in Fe-based oxygen reduction electrocatalysts for zinc-air battery

Zhiwen Li,<sup>‡1,3</sup> Yan Xie,<sup>‡2</sup> Jianxin Gao,<sup>‡2</sup> Jia Zhang,<sup>1</sup> Xiaoke Zhang,<sup>2</sup> Yu Liu,<sup>2</sup> and Gao Li<sup>1,3\*</sup>

<sup>1</sup>State Key Laboratory of Catalysis, Dalian Institute of Chemical Physics, Chinese Academy of Sciences, Dalian 116023, China.

<sup>2</sup>Dalian National Laboratory for Clean Energy, Dalian Institute of Chemical Physics, Chinese Academy of Sciences, Dalian 116023, China.

<sup>3</sup>University of Chinese Academy of Sciences, Beijing 100049, China.

<sup>‡</sup>J. Zhang, Y. Xie, and J. Gao contributed equally.

\*E-mail: gaoli@dicp.ac.cn (G. Li)

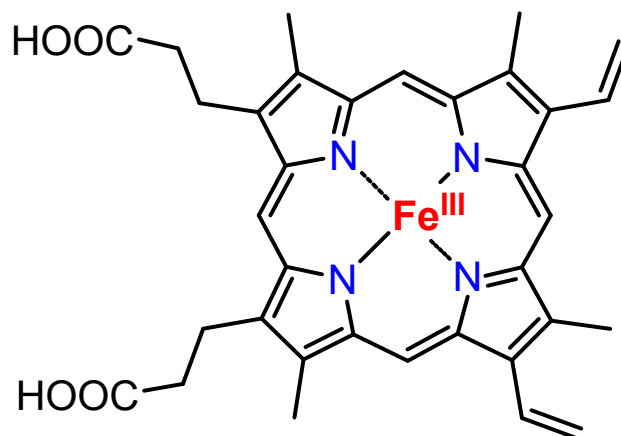

**Scheme S1.** The molecular structure of Hemin, which is a Fe-centered natural macrocyclic compound.

## II. Supporting figures

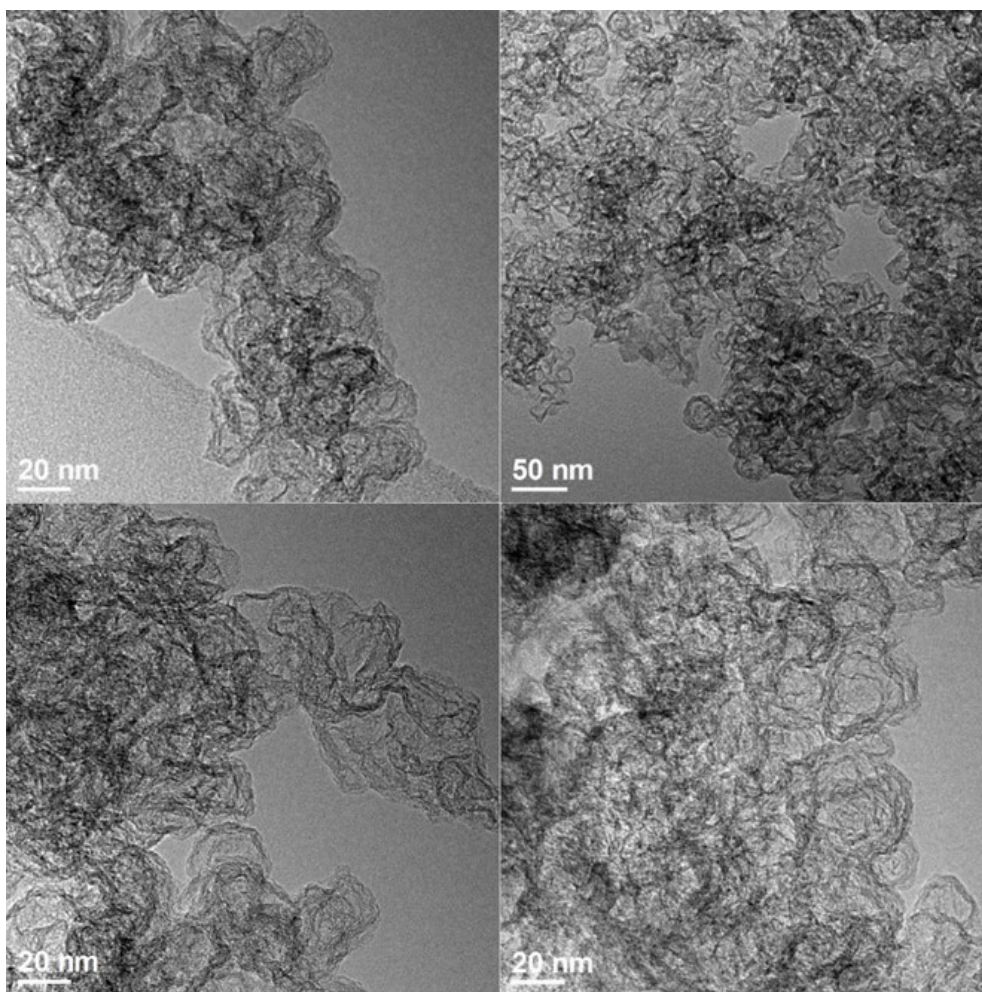

**Fig. S1.** TEM images of Hm/Cy@C-900.

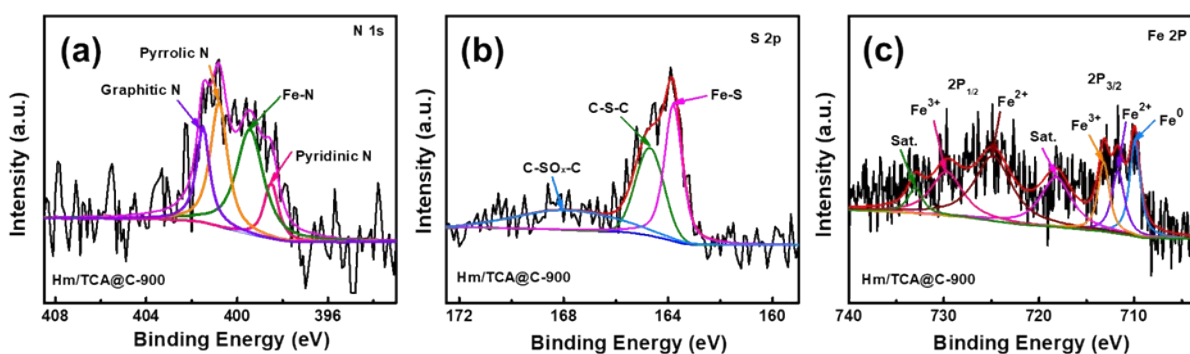

**Fig. S2.** XPS spectra of Hm/TCA@C-900 sample: (a) N 1s, (b) S 2p, and (c) Fe 2p.

In view of the Fe 2p XPS spectra in Fig. S2c, the Fe<sup>2+</sup> and Fe<sup>3+</sup> species and metallic Fe<sup>0</sup> particles were found, meaning the presence of metallic Fe, Fe<sub>3</sub>C, FeN<sub>x</sub>, FeS<sub>x</sub>, or Fe<sub>3</sub>O<sub>4</sub> species in the electrocatalysts.

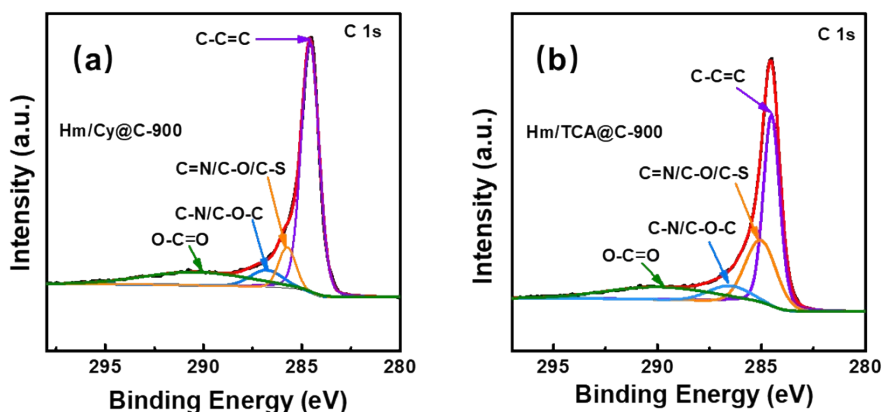

**Fig. S3.** C 1s XPS spectra of (a) Hm/Cy@C-900 and (b) Hm/TCA@C-900 samples.

C 1s XPS was deconvoluted into four peaks, locating at 284.6, 285.7, 286.8, and 290.3 eV, matching with the C-C=C, C=N/C-O/C-S, C-N/C-O-C, and O-C=O species, respectively.<sup>[1,2]</sup> The prominent peak at 284.6 eV, attributed to  $sp^2$ -hybridized C, suggests a high degree of graphitization.

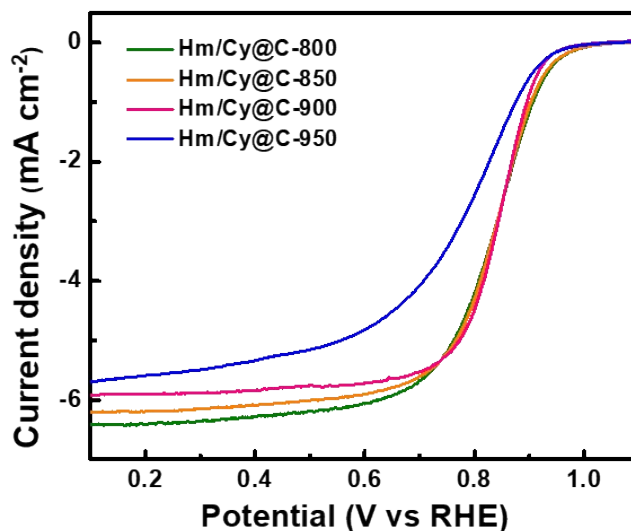

**Fig. S4.** ORR polarization curves of Hm/Cy@C-T (T: 800, 850, 900 and 950 °C) at  $5 \text{ mV s}^{-1}$  in  $\text{O}_2$ -saturated 0.1 M KOH solution. Thus, Hm/Cy@C-900 exhibited the best ORR activity, based on the value of  $E_{1/2}$ .

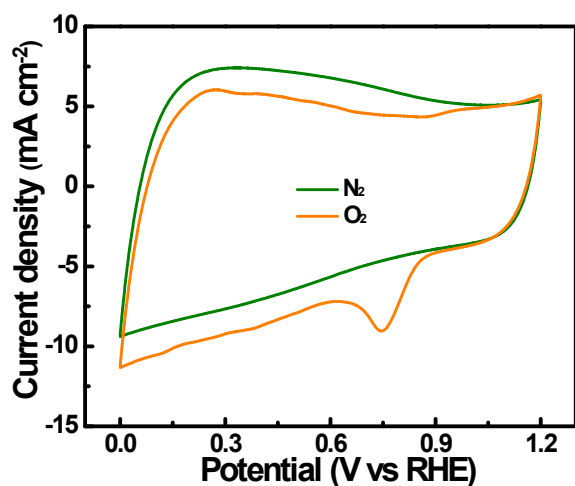

**Fig. S5.** CV curves in O<sub>2</sub>- or N<sub>2</sub>-saturated 0.1 M KOH solution of Hm/Cy@C-900 at 100 mV s<sup>-1</sup>. The reduction peak observed at ~ 0.78 V (vs RHE) suggested that Hm/Cy@C-900 is effective in ORR.

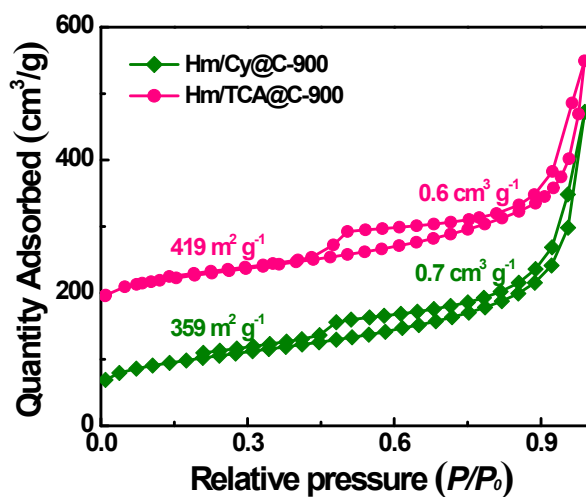

**Fig. S6.** N<sub>2</sub> adsorption-desorption isotherms of Hm/Cy@C-900 and Hm/TCA@C-900 samples. The isotherm for Hm/TCA@C-900 was offset vertically by 100 cm<sup>3</sup> g<sup>-1</sup>.

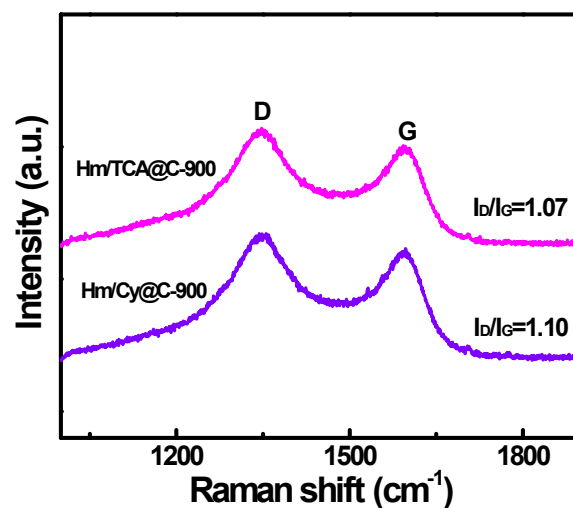

**Fig. S7.** Raman spectra of Hm/Cy@C-900 and Hm/TCA@C-900 samples.

Two typical peaks at 1344 (D band) and 1596 cm<sup>-1</sup> (G band) stand for the disordered carbon (the defects) and sp<sup>2</sup>-hybridization carbon species (graphitization), respectively.<sup>[3]</sup> The I<sub>D</sub>/I<sub>G</sub> value of Hm/Cy@C-900 (1.10) is higher than that of Hm/TCA@C-900 (1.07), demonstrating that Hm/Cy@C-900 has more defect carbon and disordered carbon matrix, which is conducive to ORR.<sup>[4]</sup>

### III. Supporting tables

**Table S1.** The fitting parameters of high-resolution XPS N1s spectra of Hm/Cy@C-900 and Hm/TCA@C-900 samples.

| Catalysts    | Binding energy of N species (eV) and content (%) |                 |                 |                 | N relative to C (at%) |
|--------------|--------------------------------------------------|-----------------|-----------------|-----------------|-----------------------|
|              | Pyridinic N                                      | Fe-N            | Pyrolic N       | Graphitic N     |                       |
| Hm/Cy@C-900  | 398.4<br>(37.3)                                  | 399.3<br>(18.1) | 400.7<br>(34.1) | 401.7<br>(10.5) | 2.4                   |
| Hm/TCA@C-900 | 398.5<br>(11.4)                                  | 399.4<br>(39.6) | 400.8<br>(30.1) | 401.5<br>(18.9) | 1.9                   |

**Table S2.** The fitting parameters of high-resolution XPS S 2p spectra of Hm/Cy@C-900 and Hm/TCA@C-900 samples.

| Catalysts    | Binding energy of S species (eV) and content (%) |                 |                      |
|--------------|--------------------------------------------------|-----------------|----------------------|
|              | Fe-S                                             | C-S-C           | C-SO <sub>x</sub> -C |
| Hm/Cy@C-900  | 163.8<br>(38.1)                                  | 164.8<br>(39.4) | 167.5<br>(22.5)      |
| Hm/TCA@C-900 | 163.8<br>(40.4)                                  | 164.7<br>(32.6) | 167.8<br>(27.0)      |

**Table S3.** Fitting parameters of <sup>57</sup>Fe Mössbauer spectrum for Hm/Cy@C-900 catalyst.

| Site      | $\delta_{iso}$ (mms <sup>-1</sup> ) | $\Delta E_Q$ | FWHM (mms <sup>-1</sup> ) | Area (%) | Assignment                                   |
|-----------|-------------------------------------|--------------|---------------------------|----------|----------------------------------------------|
| Doublet 1 | 0.29                                | 0.74         | 0.58                      | 8.55     | Fe <sup>III</sup> N <sub>4</sub> (five fold) |
| Doublet 2 | 0.40                                | 2.81         | 0.58                      | 7.18     | Fe <sup>III</sup> N <sub>4</sub> (six fold)  |
| Sextet 1  | 0.19                                | 0.00         | 0.38                      | 53.51    | Fe <sub>3</sub> C                            |
| Sextet 2  | 0.77                                | -0.16        | 0.33                      | 14.96    | FeS <sub>x</sub>                             |
| Sextet 3  | 0.10                                | -0.23        | 0.42                      | 6.46     | $\alpha$ -Fe                                 |
| Sextet 4  | 0.42                                | -0.11        | 0.58                      | 9.34     | FeS <sub>x</sub>                             |

**Table S4.** Fitting parameters of  $^{57}\text{Fe}$  Mössbauer spectrum for Hm/TCA@C-900 catalyst.

| Site      | $\delta_{\text{iso}}$ (mms $^{-1}$ ) | $\Delta E_{\text{Q}}$ | FWHM (mms $^{-1}$ ) | Area (%) | Assignment                                     |
|-----------|--------------------------------------|-----------------------|---------------------|----------|------------------------------------------------|
| Doublet 1 | 0.28                                 | -0.07                 | 0.38                | 6.22     | $\text{Fe}_3\text{O}_4$ (+3.0)                 |
| Doublet 2 | 0.56                                 | 0.10                  | 0.68                | 12.43    | $\text{Fe}_3\text{O}_4$ (+2.5)                 |
| Sextet 1  | -0.02                                | 0.01                  | 0.31                | 18.84    | $\alpha$ -Fe                                   |
| Sextet 2  | 0.17                                 | 0.01                  | 0.35                | 41.41    | $\text{Fe}_3\text{C}$                          |
| Sextet 3  | 0.29                                 | 0.83                  | 0.58                | 6.92     | $\text{Fe}^{\text{III}}\text{N}_4$ (five fold) |
| Sextet 4  | 0.52                                 | 1.65                  | 0.58                | 4.83     | $\text{Fe}^{\text{II}}\text{N}_4$ (four fold)  |
| Sextet 5  | 0.75                                 | -0.26                 | 0.58                | 9.35     | $\text{FeS}_x$                                 |

**Table S5.** Comparison of the ORR performances of Hm/Cy@C-900 and presentative reported Fe-based NNMEs in a  $\text{O}_2$ -saturated 0.1 M KOH solution in recent five years.

| Catalyst                     | Carbon source                       | $E_{\text{onset}}$ (V) | $E_{1/2}$ (V) | $J_{\text{L}}$ (mA cm $^{-2}$ ) | Ref.      |
|------------------------------|-------------------------------------|------------------------|---------------|---------------------------------|-----------|
| Hm/Cy@C-900                  | carbon ECP                          | 0.93                   | 0.845         | 5.76                            | This work |
| $\text{Fe}_1$ -HNC-500-850   | glucose                             | 0.93                   | 0.842         | 5.80                            | [5]       |
| Fe/N/S-PCNT                  | polypyrrole                         | 0.96                   | 0.840         | --                              | [6]       |
| $\text{Fe}_3\text{C}$ @NCNTs | g- $\text{C}_3\text{N}_4$           | 0.92                   | 0.840         | 5.80                            | [7]       |
| Fe-N-C/MXene                 | $\text{C}_3\text{N}_4$              | 0.92                   | 0.840         | --                              | [8]       |
| Fe/OES                       | 2-methylimidazole                   | 1.00                   | 0.850         | --                              | [9]       |
| Fe-SAC/NC                    | adenine                             | 0.95                   | 0.840         | --                              | [10]      |
| OM-NCNF- $\text{FeN}_x$      | PAN, branched silica nanoaggregates | 0.905                  | 0.836         | 5.6                             | [11]      |
| Fe/Mn-N-C                    | dopamine hydrochloride              | 1.02                   | 0.880         | 5.7                             | [12]      |
| Ni-N $_4$ /GHSs/Fe-N $_4$    | graphene oxide                      | 0.93                   | 0.83          | --                              | [13]      |
| PtFeNC                       | 2-methylimidazole                   | 1.05                   | 0.895         | 6.20                            | [14]      |

## Reference

- [1] K. Li, J. Li, H. Yu, F. Lin, G. Feng, M. Jiang, D. Yuan, B. Yan, G. Chen, *Sci. Total. Environ.* 819 (2022) 153115.
- [2] Y. Liu, Y. Xu, H. Wang, J. Zhang, H. Zhao, L. Chen, L. Xu, Y. Xie, J. Huang, *Catalysts* 12 (2022) 806.
- [3] F. Kong, X. Cui, Y. Huang, H. Yao, Y. Chen, H. Tian, G. Meng, C. Chen, Z. Chang, J. Shi, *Angew. Chem. Int. Ed.* 61 (2022) 202116290.
- [4] W. Li, L. Wu, X. Wu, C. Shi, Y. Li, L. Zhang, H. Mi, Q. Zhang, C. He, X. Ren, *Appl. Catal. B-Environ.* 303 (2022) 120849.
- [5] X. Zhang, S. Zhang, Y. Yang, L. Wang, Z. Mu, H. Zhu, X. Zhu, H. Xing, H. Xia, B. Huang, J. Li, S. Guo, E. Wang, *Adv. Mater.* 32 (2020) 1906905.
- [6] Z. Tan, H. Li, Q. Feng, L. Jiang, H. Pan, Z. Huang, Q. Zhou, H. Zhou, S. Ma, Y. Kuang, *J. Mater. Chem. A* 7 (2019) 1607.
- [7] C. Xu, C. Guo, J. Liu, B. Hu, J. Dai, M. Wang, R. Jin, Z. Luo, H. Li, C. Chen, *Energy Storage Mater.* 51 (2022) 149.
- [8] L. Jiang, J. Duan, J. Zhu, S. Chen, M. Antonietti, *ACS Nano* 14 (2020) 2436.
- [9] C. Hou, L. Zou, L. Sun, K. Zhang, Z. Liu, Y. Li, C. Li, R. Zou, J. Yu, Q. Xu, *Angew. Chem. Int. Ed.* 59 (2020) 7384.
- [10] J. Hu, D. Wu, C. Zhu, C. Hao, C. Xin, J. Zhang, J. Guo, N. Li, G. Zhang, Y. Shi, *Nano Energy* 72 (2020) 104670.
- [11] C. Cheng, S. Li, Y. Xia, L. Ma, C. Nie, C. Roth, A. Thomas, R. Haag, *Adv. Mater.* 30 (2018) 1802669.
- [12] Z. Chen, X. Liao, C. Sun, K. Zhao, D. Ye, J. Li, G. Wu, J. Fang, H. Zhao, J. Zhang, *Appl. Catal. B-Environ.* 288 (2021) 120021.
- [13] J. Chen, H. Li, C. Fan, Q. Meng, Y. Tang, X. Qiu, G. Fu, T. Ma, *Adv. Mater.* 32 (2020) 2003134.
- [14] X. Zhong, S. Ye, J. Tang, Y. Zhu, D. Wu, M. Gu, H. Pan, B. Xu, *Appl. Catal. B-Environ.* 286 (2021) 119891.
